# Supplementary material
Source: publisher figshare collection journal article supplement (https://acs.figshare.com/ndownloader/files/3834691)
Supplement: Supplementary file 1 [file 3834691]

## Supporting Information

### **K<sub>2</sub>Ca<sub>4</sub>[(UO<sub>2</sub>)(Si<sub>2</sub>O<sub>7</sub>)<sub>2</sub>]: A Uranyl Silicate with a One-Dimensional Chain Structure**

**Chia-Lin Liu,<sup>a</sup> Hsin-Kuan Liu,<sup>a</sup> Wen-Jung Chang,<sup>a</sup> and Kwang-Hwa Lii<sup>a,b,\*</sup>**

*<sup>a</sup>Department of Chemistry, National Central University, Zhongli, Taiwan 320*

*<sup>b</sup>Institute of Chemistry, Academia Sinica, Taipei, Taiwan 115*

**Figure S1.** The observed and simulated X-ray powder patterns of K<sub>2</sub>Ca<sub>4</sub>[(UO<sub>2</sub>)(Si<sub>2</sub>O<sub>7</sub>)<sub>2</sub>].

**Figure S2.** Room-temperature emission spectrum of K<sub>2</sub>Ca<sub>4</sub>[(UO<sub>2</sub>)(Si<sub>2</sub>O<sub>7</sub>)<sub>2</sub>] excited at 365 nm.

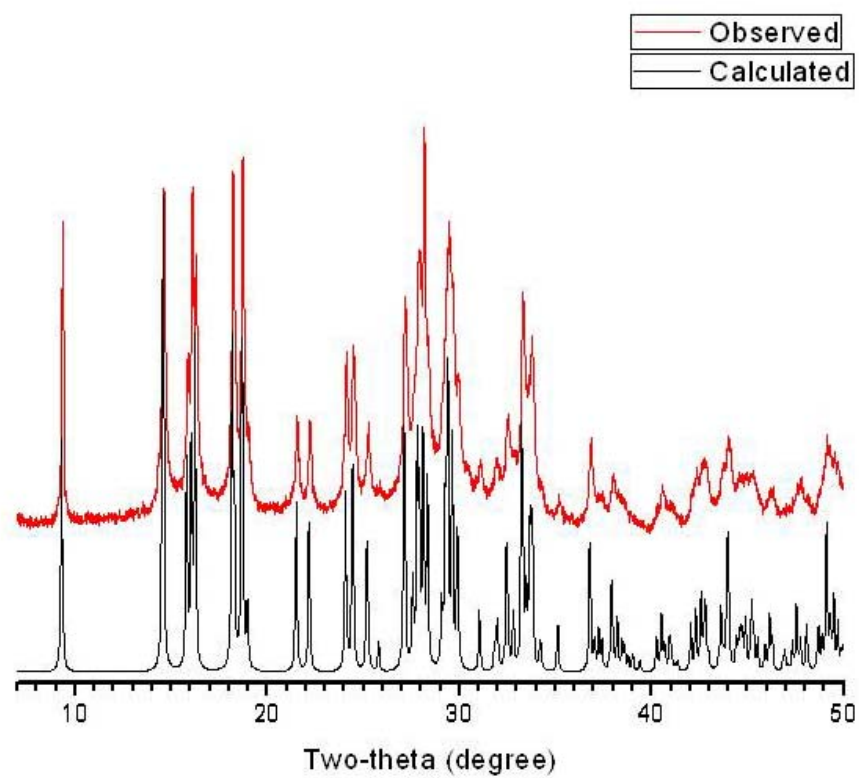

**Figure S1**

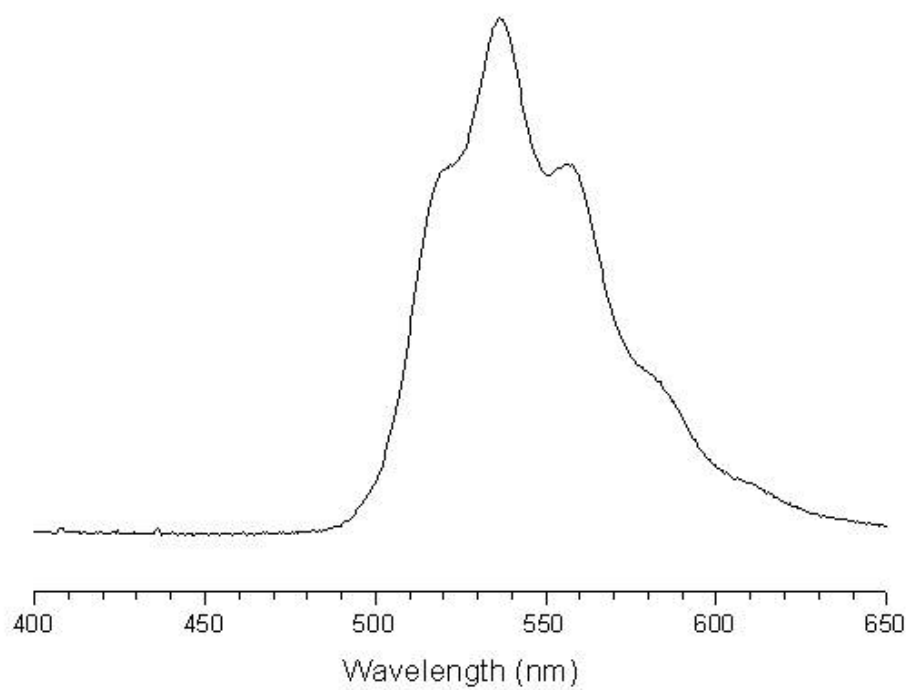

**Figure S2**
